# Supplementary material for: Performance improvement of MXene-based perovskite solar cells upon property transition from metallic to semiconductive by oxidation of Ti3C2Txin air
Source: Royal Society of Chemistry journal article supplement (doi:10.1039/d0ta11397b), 2021-01-01
Supplement: d0ta11397b1.pdf [file d0ta11397b1.pdf]

## Supporting Information

# Performance improvement of MXene-based perovskite solar cells upon property transition from metallic to semiconductive by oxidation of $\text{Ti}_3\text{C}_2\text{T}_x$ in air

Lin Yang <sup>a</sup>, Dongxiao Kan <sup>a</sup>, Chunxiang Dall'Agnesse <sup>a</sup>, Yohan Dall'Agnesse <sup>b</sup>, Baoning Wang <sup>a</sup>, Ajay Kumar Jena <sup>c</sup>, Yingjin Wei <sup>a</sup>, Gang Chen <sup>a</sup>, Xiao-Feng Wang <sup>a, \*</sup>, Yury Gogotsi <sup>d</sup> and Tsutomu Miyasaka <sup>c</sup>

<sup>a</sup> *Key Laboratory of Physics and Technology for Advanced Batteries (Ministry of Education), College of Physics, Jilin University, 2699 Qianjin Street, Changchun 130012, China*

<sup>b</sup> *Institute for Materials Discovery, University College London, London WC1E 7JE, United Kingdom*

<sup>c</sup> *Graduate School of Engineering, Tooin University of Yokohama, 1614 Kurogane-cho, Aoba, Yokohama, Kanagawa 225-8503, Japan*

<sup>d</sup> *A. J. Drexel Nanomaterials Institute, and Department of Materials Science and Engineering, Drexel University, Philadelphia, Pennsylvania 19104, United States*

### Corresponding Authors

\* Xiao-Feng Wang, *E-mail*: xf\_wang@jlu.edu.cn

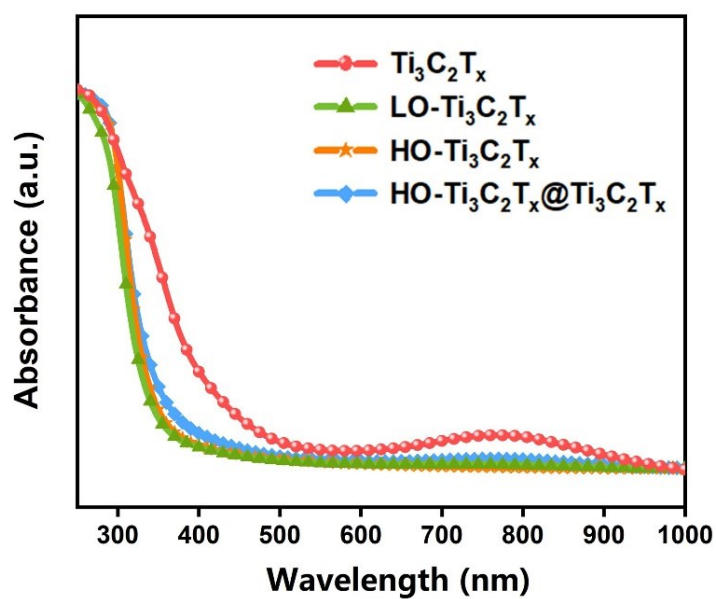

**Figure S1.** UV-vis absorption spectra of  $\text{Ti}_3\text{C}_2\text{T}_x$ ,  $\text{LO-Ti}_3\text{C}_2\text{T}_x$ ,  $\text{HO-Ti}_3\text{C}_2\text{T}_x$  and  $\text{HO-Ti}_3\text{C}_2\text{T}_x@\text{Ti}_3\text{C}_2\text{T}_x$ .

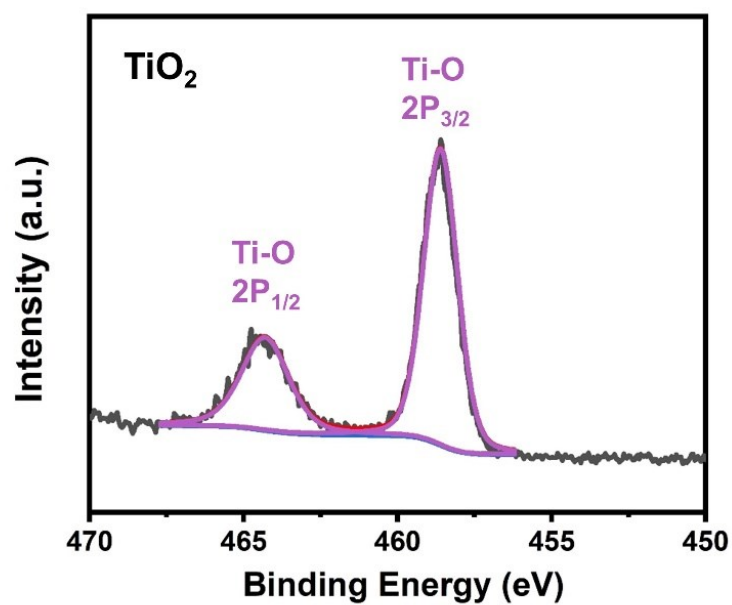

**Figure S2.** Ti 2p core level XPS spectra of the films of  $\text{TiO}_2$ .

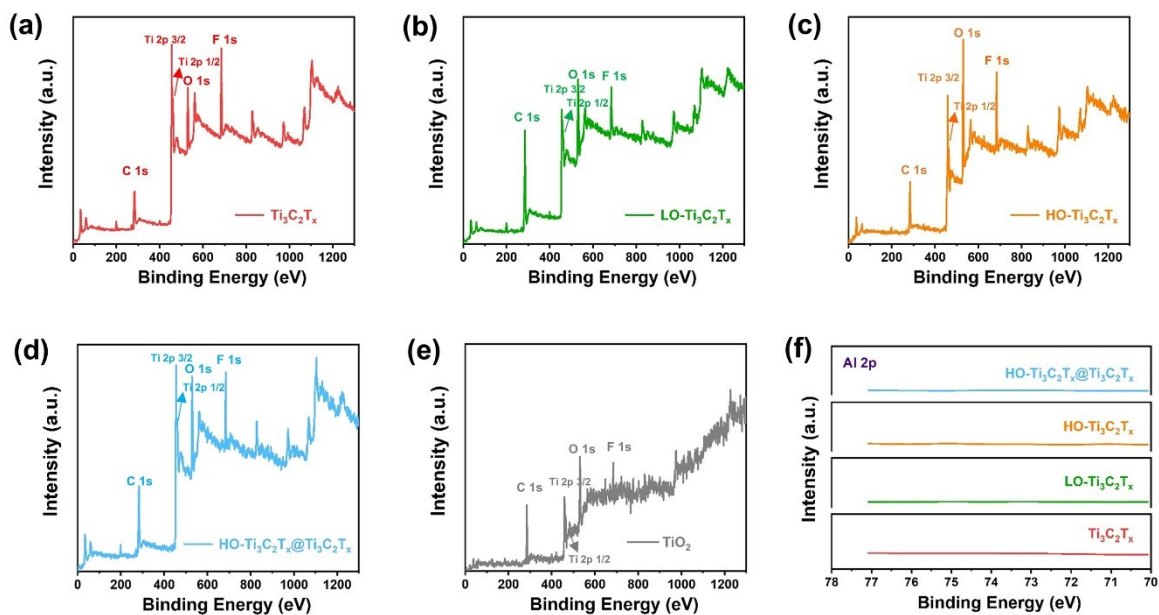

**Figure S3.** XPS spectra of the films of (a)  $\text{Ti}_3\text{C}_2\text{T}_x$ , (b)  $\text{LO-Ti}_3\text{C}_2\text{T}_x$ , (c)  $\text{HO-Ti}_3\text{C}_2\text{T}_x$ , (d)  $\text{HO-Ti}_3\text{C}_2\text{T}_x@\text{Ti}_3\text{C}_2\text{T}_x$  and (e)  $\text{TiO}_2$ , respectively. (f) High resolution XPS spectra for Al 2p region for  $\text{Ti}_3\text{C}_2\text{T}_x$ ,  $\text{LO-Ti}_3\text{C}_2\text{T}_x$ ,  $\text{HO-Ti}_3\text{C}_2\text{T}_x$  and  $\text{HO-Ti}_3\text{C}_2\text{T}_x@\text{Ti}_3\text{C}_2\text{T}_x$ .

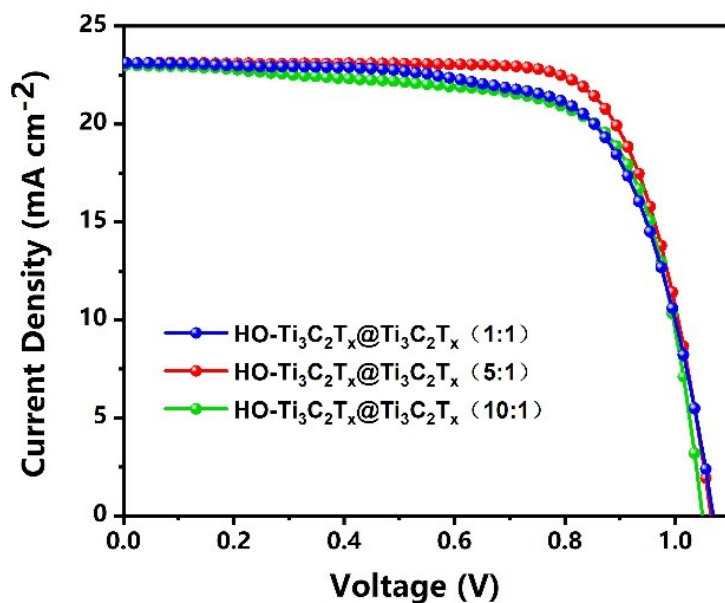

**Figure S4.** Reverse scan of PSCs'  $J-V$  curves based on HO-Ti<sub>3</sub>C<sub>2</sub>T<sub>x</sub>@Ti<sub>3</sub>C<sub>2</sub>T<sub>x</sub> with different volume ratio (1:1, 5:1 and 10:1) as ETLs under AM 1.5 G simulated illumination.

**Table S1.** The photovoltaic performance parameters of PSCs with reverse scan based on HO-Ti<sub>3</sub>C<sub>2</sub>T<sub>x</sub>@Ti<sub>3</sub>C<sub>2</sub>T<sub>x</sub> with different volume ratio of 1:1, 5:1 and 10:1 as ETLs under AM 1.5 G simulated illumination.

| ETL                                                                                                    | $V_{oc}$ (V) | $J_{sc}$ (mA cm <sup>-2</sup> ) | FF (%) | PCE (%) |
|--------------------------------------------------------------------------------------------------------|--------------|---------------------------------|--------|---------|
| HO-Ti <sub>3</sub> C <sub>2</sub> T <sub>x</sub> @Ti <sub>3</sub> C <sub>2</sub> T <sub>x</sub> (1:1)  | 1.06         | 23.12                           | 69     | 16.91   |
| HO-Ti <sub>3</sub> C <sub>2</sub> T <sub>x</sub> @Ti <sub>3</sub> C <sub>2</sub> T <sub>x</sub> (5:1)  | 1.07         | 23.11                           | 74     | 18.29   |
| HO-Ti <sub>3</sub> C <sub>2</sub> T <sub>x</sub> @Ti <sub>3</sub> C <sub>2</sub> T <sub>x</sub> (10:1) | 1.06         | 22.83                           | 69     | 16.63   |

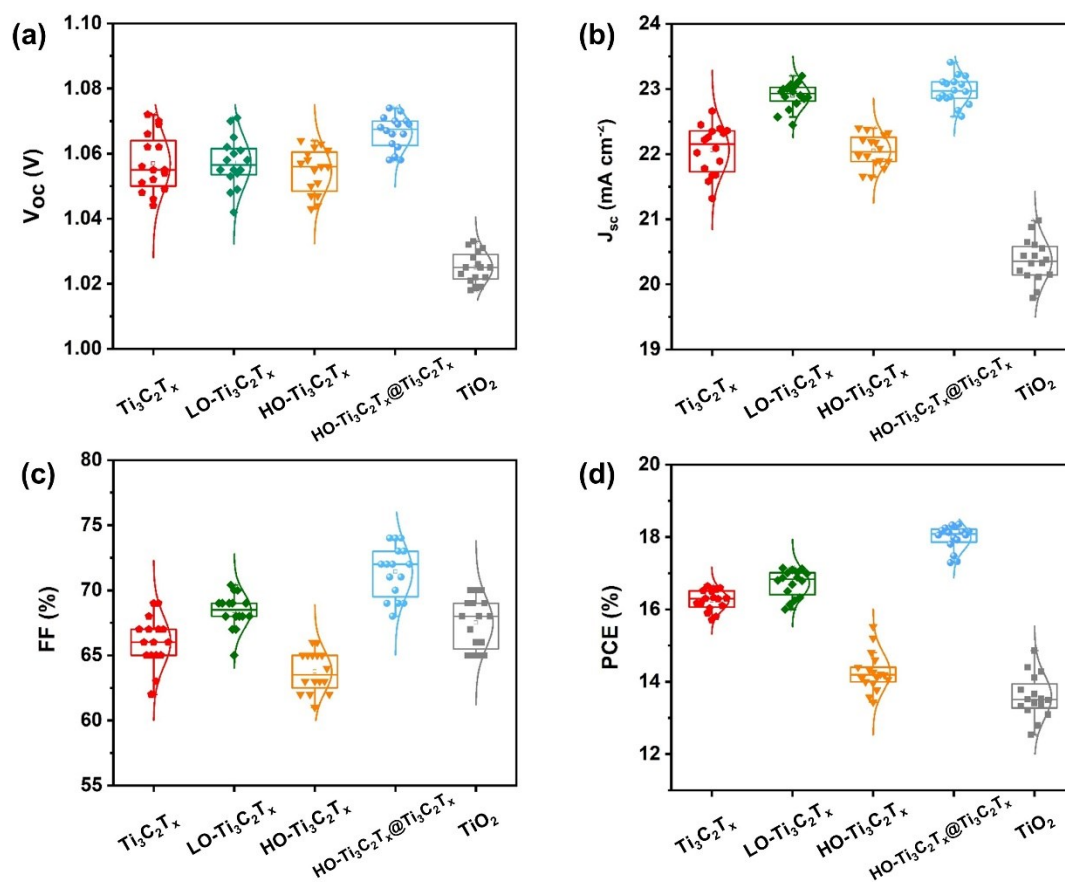

**Figure S5.** Photovoltaic parameter statistics of (a)  $V_{oc}$ , (b)  $J_{sc}$ , (c) FF and (d) PCE for the investigated PSCs. Parameters are extracted from the  $J-V$  curves acquired with reverse scan of 16 PSCs for each condition under AM 1.5 G simulated illumination.

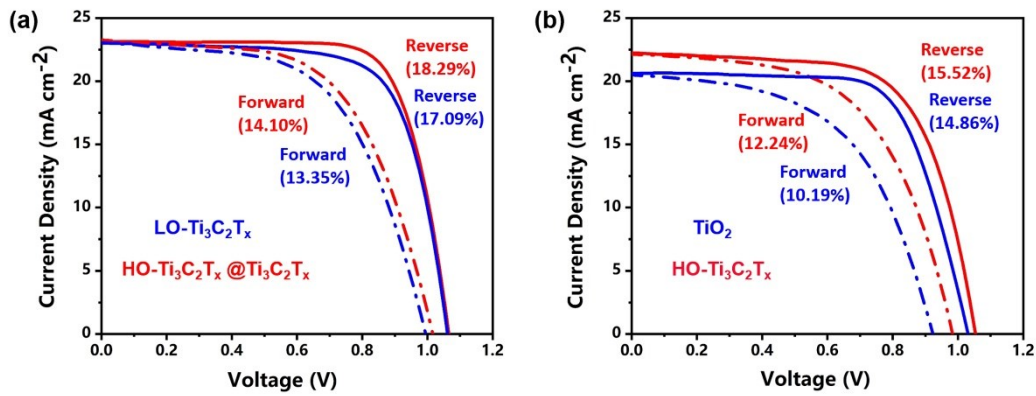

**Figure S6.** Forward and reverse scans of  $J-V$  curves for the devices based on (a) LO- $\text{Ti}_3\text{C}_2\text{T}_x$ , HO- $\text{Ti}_3\text{C}_2\text{T}_x@ \text{Ti}_3\text{C}_2\text{T}_x$  and (b)  $\text{TiO}_2$ , HO- $\text{Ti}_3\text{C}_2\text{T}_x$ .

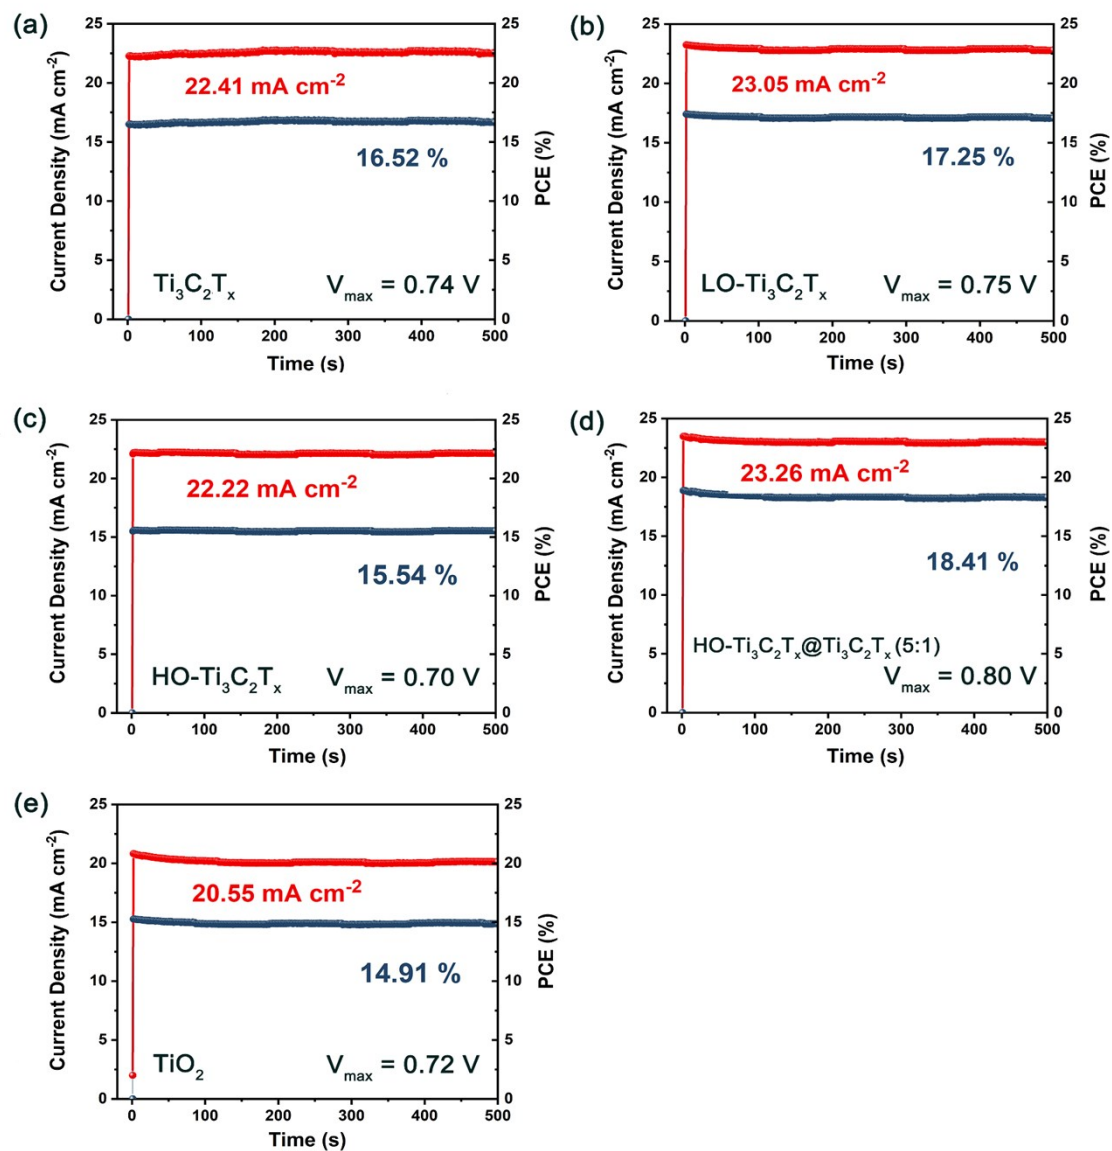

**Figure S7.** Steady-state power output and current density of devices based on (a)  $\text{Ti}_3\text{C}_2\text{T}_x$ , (b)  $\text{LO-Ti}_3\text{C}_2\text{T}_x$ , (c)  $\text{HO-Ti}_3\text{C}_2\text{T}_x$ , (d)  $\text{HO-Ti}_3\text{C}_2\text{T}_x@Ti_3C_2T_x$  and (e)  $\text{TiO}_2$  as ETLs, respectively.

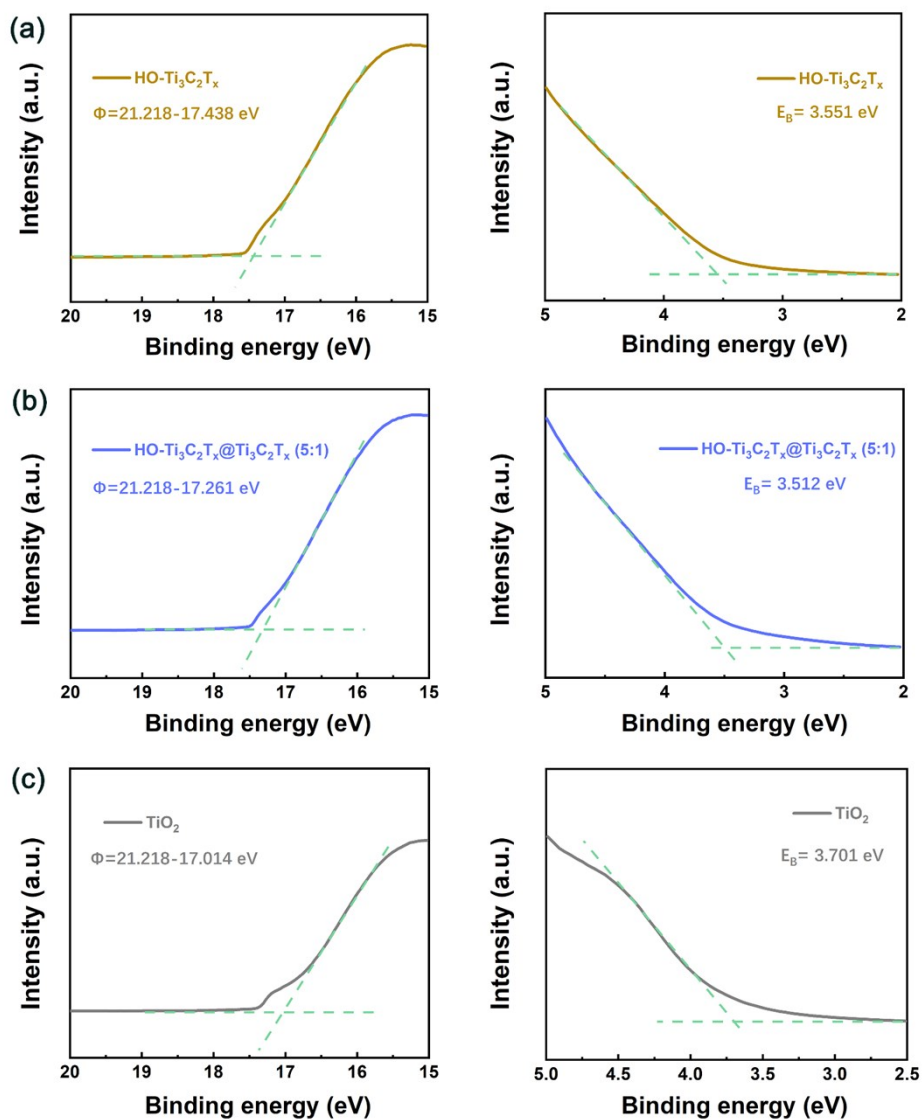

**Figure S8.** Ultraviolet photoelectron spectra of (a) HO-Ti<sub>3</sub>C<sub>2</sub>T<sub>x</sub>, (b) HO-Ti<sub>3</sub>C<sub>2</sub>T<sub>x</sub>@Ti<sub>3</sub>C<sub>2</sub>T<sub>x</sub> and (c) TiO<sub>2</sub> films spin-coated onto ITO substrates. The HOMO energy levels were determined by the intersection of baseline with the tangent line of the spectra, which is,  $\text{HOMO} = -(\Phi + E_B)$  (eV).

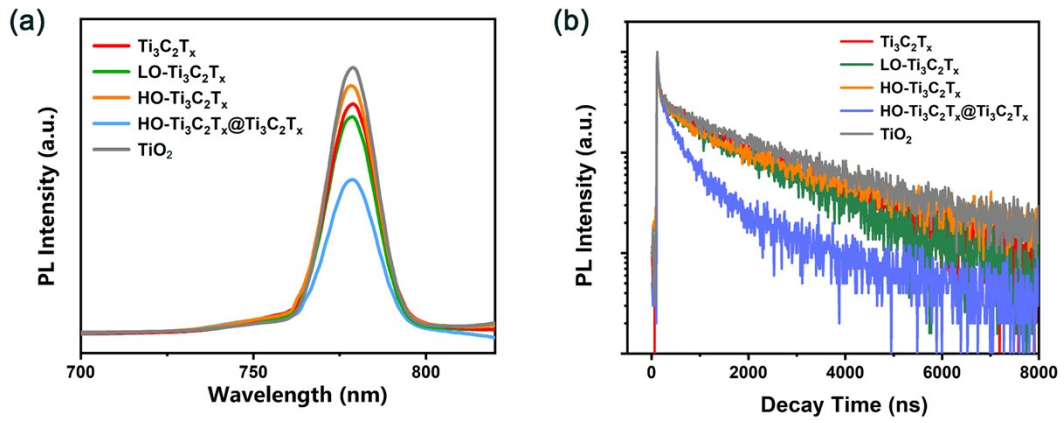

**Figure S9.** PL and TRPL spectra (excitation at 403 nm) of ITO/ $\text{Ti}_3\text{C}_2\text{T}_x$ /CH<sub>3</sub>NH<sub>3</sub>PbI<sub>3</sub>, ITO/LO- $\text{Ti}_3\text{C}_2\text{T}_x$ /CH<sub>3</sub>NH<sub>3</sub>PbI<sub>3</sub>, ITO/HO- $\text{Ti}_3\text{C}_2\text{T}_x$ /CH<sub>3</sub>NH<sub>3</sub>PbI<sub>3</sub>, ITO/HO- $\text{Ti}_3\text{C}_2\text{T}_x@\text{Ti}_3\text{C}_2\text{T}_x$ /CH<sub>3</sub>NH<sub>3</sub>PbI<sub>3</sub> and ITO/ $\text{TiO}_2$ /CH<sub>3</sub>NH<sub>3</sub>PbI<sub>3</sub>.



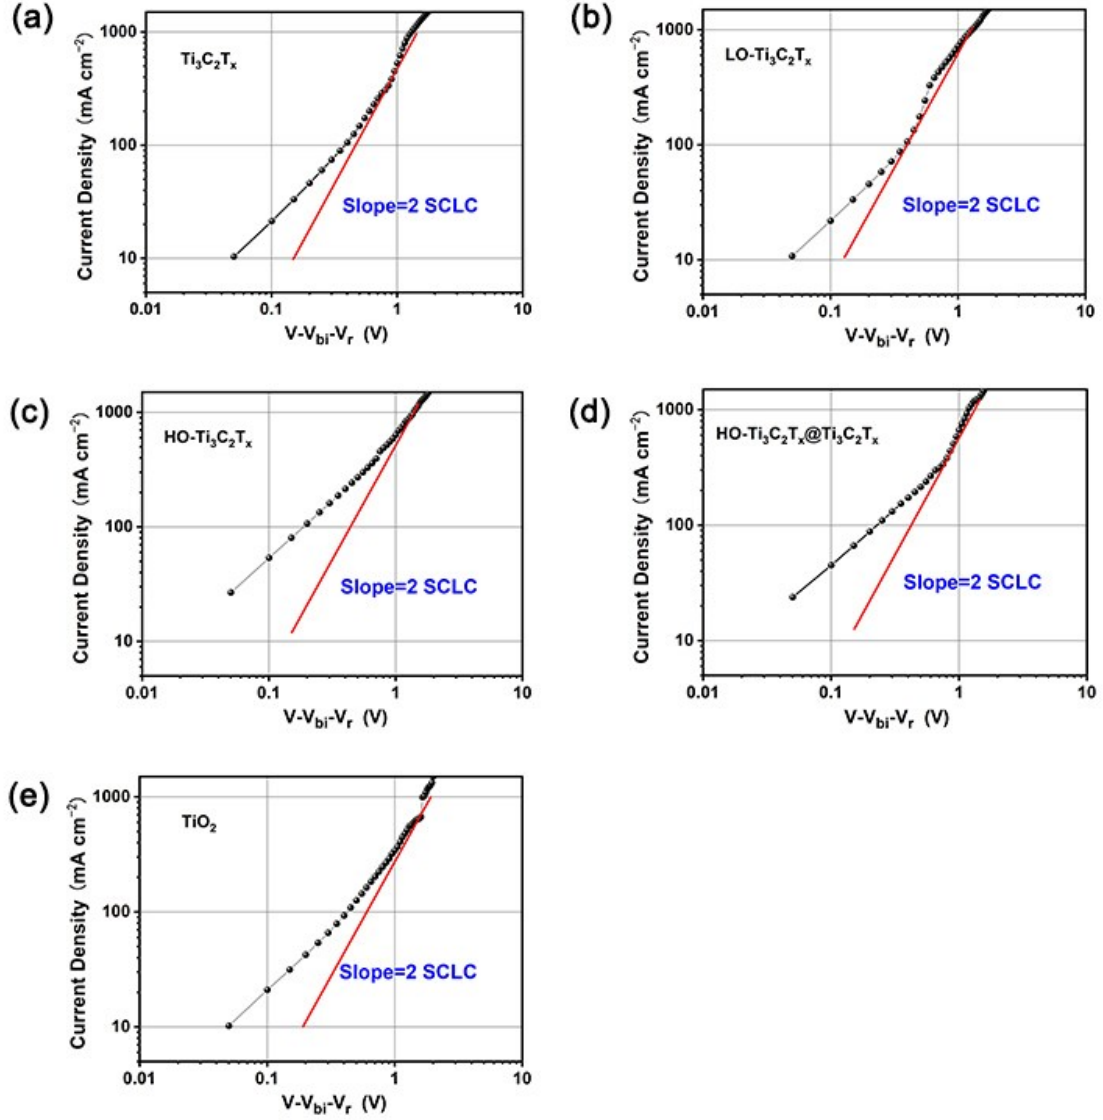

**Figure S10.** Typical  $J$ - $V$  curves for the devices based on (a) Ti<sub>3</sub>C<sub>2</sub>T<sub>x</sub>, (b) LO-Ti<sub>3</sub>C<sub>2</sub>T<sub>x</sub>, (c) HO-Ti<sub>3</sub>C<sub>2</sub>T<sub>x</sub>, (d) HO-Ti<sub>3</sub>C<sub>2</sub>T<sub>x</sub>@Ti<sub>3</sub>C<sub>2</sub>T<sub>x</sub> and (e) TiO<sub>2</sub> as ETLs under dark, respectively.

The electron mobilities of ETLs were analyzed by the  $J$ - $V$  curves with the electron-only structure of ITO/SnO<sub>2</sub>/ETL/BCP/Ag under dark, and were calculated with the following equation:

$$J = 9\varepsilon_0\varepsilon_r\mu(V - V_{bi} - V_r)^2/8L^3$$

where  $\mu$  is electron mobility ( $\text{cm}^2 \text{V}^{-1} \text{s}^{-1}$ ),  $J$  represents the current density ( $\text{mA cm}^{-2}$ ),  $\epsilon_0$  indicates the permittivity of free space ( $\text{mA s V}^{-1} \text{cm}^{-1}$ ),  $\epsilon_r$  represents the dielectric constant of ETLs (assumed as 3),  $V$  is the applied voltage (V),  $V_r$  is the voltage drop (V) due to the series resistance and contact resistance across the electrodes,  $V_{bi}$  is the built-in voltage (V),  $V - V_{bi} - V_r$  is obtained through a slope in the double log plot equals to 2, and  $L$  is the thickness of ETLs film (cm).

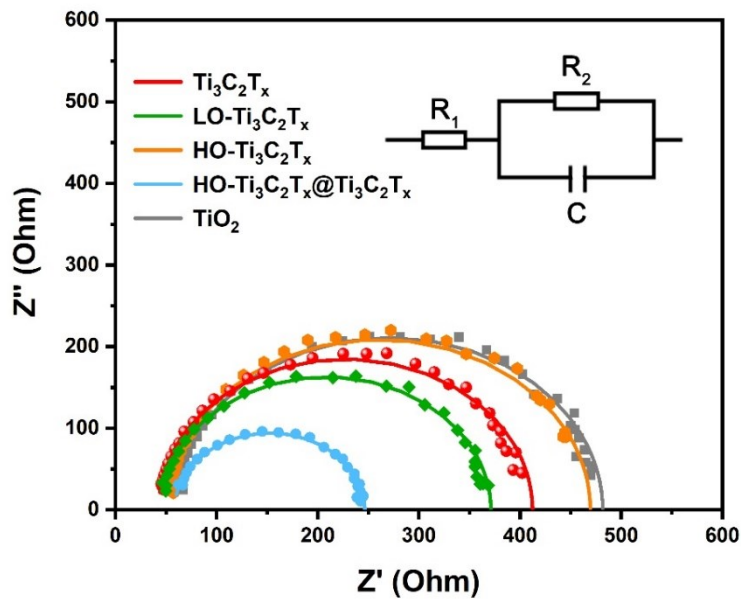

**Figure S11.** Nyquist plots of the PSCs based on  $\text{Ti}_3\text{C}_2\text{T}_x$ ,  $\text{LO-Ti}_3\text{C}_2\text{T}_x$ ,  $\text{HO-Ti}_3\text{C}_2\text{T}_x$ ,  $\text{HO-Ti}_3\text{C}_2\text{T}_x@ \text{Ti}_3\text{C}_2\text{T}_x$  and  $\text{TiO}_2$  as ETLs under one sun illumination, where the scattered points are experimental data and the solid lines are the fitted curves according to the equivalent circuit.

**Table S2.** Fitting parameters for EIS data.

| ETL                               | $R_1$ ( $\Omega$ ) | $R_2$ ( $\Omega$ ) | C (F)    |
|-----------------------------------|--------------------|--------------------|----------|
| $\text{Ti}_3\text{C}_2\text{T}_x$ | 42.78              | 369.5              | 7.456E-9 |

|                                                                                                  |       |       |           |
|--------------------------------------------------------------------------------------------------|-------|-------|-----------|
| LO-Ti <sub>3</sub> C <sub>2</sub> T <sub>x</sub>                                                 | 45.53 | 325.6 | 6.698 E-9 |
| HO-Ti <sub>3</sub> C <sub>2</sub> T <sub>x</sub>                                                 | 51.96 | 417.5 | 7.429 E-9 |
| HO-Ti <sub>3</sub> C <sub>2</sub> T <sub>x</sub> @ Ti <sub>3</sub> C <sub>2</sub> T <sub>x</sub> | 56.28 | 188.2 | 8.394 E-9 |
| TiO <sub>2</sub>                                                                                 | 59.73 | 422.1 | 6.921E-9  |

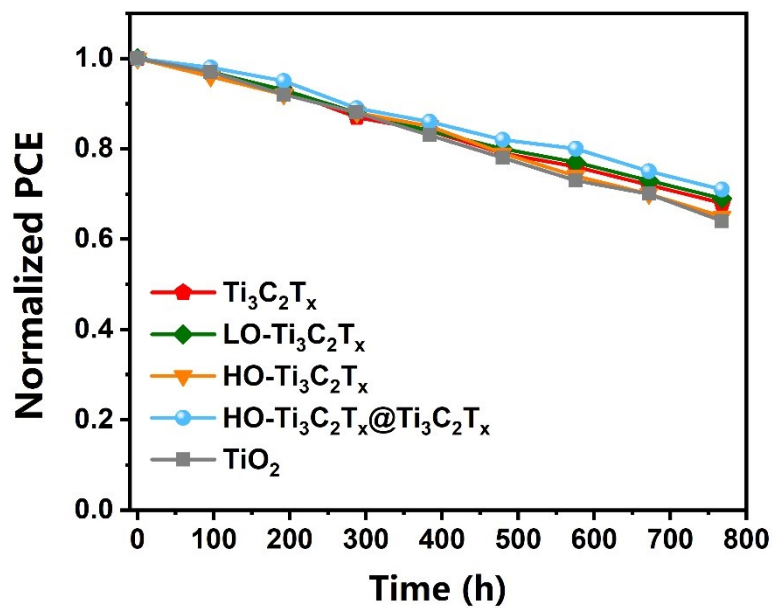

**Figure S12.** Stability results of PSCs based on Ti<sub>3</sub>C<sub>2</sub>T<sub>x</sub>, LO-Ti<sub>3</sub>C<sub>2</sub>T<sub>x</sub>, HO-Ti<sub>3</sub>C<sub>2</sub>T<sub>x</sub>, HO-Ti<sub>3</sub>C<sub>2</sub>T<sub>x</sub>@Ti<sub>3</sub>C<sub>2</sub>T<sub>x</sub> and TiO<sub>2</sub> as ETLs in ambient air (relative humidity  $\approx$  20%) without encapsulation at 25 °C.
